# Supplementary material for: Exogenous Coronavirus Interacts With Endogenous Retrotransposon in Human Cells
Source: Front Cell Infect Microbiol. 2021 Feb 25;11:609160. doi: 10.3389/fcimb.2021.609160 (PMC7959850; doi:10.3389/fcimb.2021.609160)
Supplement: Supplementary Table 1 — The ratio of read-through reads to total initiating TE reads for TMEM156, MYADM and BCL3 genes. [file Table_1.xlsx]

## Sheet: Sheet1
	gene	TE	read-through	total initiating TE reads	ratio
Mock(A549)	BCL3	MIRb:MIR:SINE	4	24	0.166667
CoV2(A549)	BCL3	MIRb:MIR:SINE	12	48	0.25
Mock(Calu-3)	BCL3	MIRb:MIR:SINE	0
CoV2(Calu-3)	BCL3	MIRb:MIR:SINE	0
Mock(A549)	MYADM	ERVL-E-int:ERVL:LTR	6	54	0.111111
CoV2(A549)	MYADM	ERVL-E-int:ERVL:LTR	16	107	0.149533
Mock(Calu-3)	MYADM	ERVL-E-int:ERVL:LTR	14	68	0.205882
CoV2(Calu-3)	MYADM	ERVL-E-int:ERVL:LTR	18	73	0.246575
Mock(A549)	TMEM156	AluJr:Alu:SINE	4	17	0.235294
CoV2(A549)	TMEM156	AluJr:Alu:SINE	41	157	0.261146
Mock(Calu-3)	TMEM156	AluJr:Alu:SINE	1	43	0.0232558
CoV2(Calu-3)	TMEM156	AluJr:Alu:SINE	6	61	0.0983607
